1 **Heterogeneous transcriptome response to DNA damage at single cell resolution.**

2 Sung Rye Park<sup>1,2</sup>, Sim Namkoong<sup>1,2</sup>, Zac Zezhi Zhang<sup>2</sup>, Leon Friesen<sup>3</sup>, Yu-Chih Chen<sup>4,5</sup>, Euisik  
3 Yoon<sup>4,6</sup>, Chang H. Kim<sup>3</sup>, Hojoong Kwak<sup>7</sup>, Hyun Min Kang<sup>2,\*</sup> and Jun Hee Lee<sup>1,\*</sup>

4 <sup>1</sup>Department of Molecular and Integrative Physiology, University of Michigan Medical School,  
5 Ann Arbor, MI 48109, USA. <sup>2</sup>Department of Biostatistics and Center for Statistical Genetics,  
6 University of Michigan School of Public Health, Ann Arbor, MI 48109, USA. <sup>3</sup>Department of  
7 Pathology and Mary H. Weiser Food Allergy Center, University of Michigan Medical School,  
8 Ann Arbor, MI 48109, USA. <sup>4</sup>Department of Electrical Engineering and Computer Science,  
9 University of Michigan College of Engineering, Ann Arbor, MI 48109, USA. <sup>5</sup>Forbes Institute  
10 for Cancer Discovery, University of Michigan, Ann Arbor, MI 48109, USA. <sup>6</sup>Department of  
11 Biomedical Engineering, University of Michigan College of Engineering, Ann Arbor, MI 48109,  
12 USA. <sup>7</sup>Department of Molecular Biology and Genetics, Cornell University, Ithaca NY, 14853,  
13 USA

14 \*Correspondence: hmkang@umich.edu (H.M.K); leeju@umich.edu (J.H.L)

15 **Cancer cells often heterogeneously respond to genotoxic chemotherapy, leading to**  
16 **fractional killing and chemoresistance<sup>1,2</sup>, which remain as the major obstacles in cancer**  
17 **treatment. It is widely believed that DNA damage induces a uniform response in regulating**  
18 **transcription and that cell fate is passively determined by a threshold mechanism**  
19 **evaluating the level of transcriptional responses<sup>3</sup>. On the contrary to this assumption, here**  
20 **we show that a surprisingly high level of heterogeneity exists in individual cell**  
21 **transcriptome responses to DNA damage, and that these transcriptome variations dictate**  
22 **the cell fate after DNA damage. Many DNA damage response genes, including tumor**  
23 **suppressor p53 targets, were exclusively expressed in only a subset of cells having specific**  
24 **cell fate, producing unique stress responses tailored for the fate that the cells are**  
25 **committed to. For instance, *CDKN1A*, the best known p53 target inhibiting cell cycle, was**  
26 **specifically expressed in a subset of cells undergoing cell cycle checkpoint, while other pro-**  
27 **apoptotic p53 targets were expressed only in cells undergoing apoptosis. A small group of**  
28 **cells exhibited neither checkpoint nor apoptotic responses, but produced a unique**  
29 **transcriptional program that conferred strong chemoresistance to the cells. The**  
30 **heterogeneous transcriptome response to DNA damage was also observed at the protein**  
31 **level in flow cytometry. Our results demonstrate that cell fate heterogeneity after DNA**  
32 **damage is mediated by distinct transcriptional programs generating fate-specific gene**  
33 **expression landscapes. This finding provides an important insight into understanding**  
34 **heterogeneous chemotherapy responses of cancer cells.**

35 Upon genotoxic stresses, cells respond in various ways to minimize the damage consequences<sup>4,5</sup>.  
36 Although individual cells respond differently to DNA damage, transcriptome level-studies of  
37 DNA damage response have been conducted only in bulk thus far<sup>6</sup>. Consequently, it is unknown  
38 whether the cells with different fates have continuous (Fig. 1a, upper) or distinct (Fig. 1a, lower)  
39 transcriptomic landscape. In the latter case, it could be questioned about how many distinct cell  
40 fates are possible in terms of transcriptomic phenotypes (Fig. 1b). It is also unknown whether a  
41 specific DNA damage response gene is upregulated in the whole population (Fig. 1c, upper) or in  
42 a specific subset of the population (Fig. 1c, lower), and whether different DNA damage-  
43 responsive genes are co-expressed (Fig. 1d, upper) or expressed in a mutually exclusive way in  
44 different groups of cells (Fig. 1d, lower).

45 To address these questions, we performed Drop-seq<sup>7</sup> and determined a total of 10,421 single cell  
46 transcriptome profiles from three different colon cancer cell lines: RKO, HCT116 and SW480.  
47 These cells were either untreated or treated with different doses of a genotoxic chemical 5-  
48 fluorouracil (5FU), in 10 independent Drop-seq experiments (Extended Data Fig. 1a, b). In  
49 principal component analysis (PCA), t-distributed stochastic neighbor embedding (t-SNE), and  
50 uniform manifold approximation and projection (UMAP)<sup>8</sup>, different cell lines displayed distinct  
51 transcriptomic phenotypes (Extended Data Fig. 1c). For all of these cell lines, 5FU-treated cells  
52 were clustered in locations that were distinct from untreated cells (Extended Data Fig. 1d, e),  
53 indicating that the 5FU-induced DNA damage altered single cell transcriptomes. Indeed, 5FU  
54 regulated formerly known DNA damage response genes, although the level and frequency of  
55 regulation were different across the cell lines (Extended Data Fig. 1f-h).

56 Using the RKO dataset, which exhibited the most robust DNA damage response from our dataset  
57 (Extended Data Fig. 1f-h), we explored the heterogeneity of single cell transcriptome profiles  
58 with high-dimensional clustering. We identified four major clusters of cells (Fig. 1e, f and  
59 Extended Data Fig. 2a), where one cluster (group 0; n = 1,597) mainly consists of untreated  
60 samples, while the other three clusters (groups 1, 2 and 3; n = 800, 571 and 85, respectively)  
61 correspond to 5FU-treated samples (Fig. 1g, h). Each of the three 5FU-treated clusters (groups 1-  
62 3) was found in all doses and batches (Fig. 1g, h and Extended Data Fig. 2b-e), indicating that  
63 these clustering results are not simply based on dose- or batch-specific effects.

64 The top 30 genes specifically expressed in each group were isolated through differential  
65 expression analysis (Extended Data Table 1). Each of the 5FU-treated groups has a unique subset  
66 of specific genes, which are strongly upregulated in the corresponding group but not the other  
67 groups (Fig. 1i). For instance, *CCNE2* and *CDKN1A* are among the top differentially regulated  
68 genes between the groups 1 and 2 (Extended Data Table 1). Although both genes were formerly  
69 known to be induced upon 5FU treatment in a dose-dependent manner (Fig. 1j)<sup>9</sup>, strong  
70 induction of *CCNE2* and *CDKN1A* was only observed in groups 1 and 2, respectively (Fig. 1k).  
71 Congruent with the scRNA-seq data, flow cytometry analyses clearly demonstrated that 5FU  
72 treatment provoked a single homogenous untreated population of *CCNE2*-low *CDKN1A*-low  
73 cells (Fig. 1l) to differentiate into two distinct subpopulations: *CCNE2*-high *CDKN1A*-low  
74 group 1-like cells, and *CCNE2*-low *CDKN1A*-high group 2-like cells (Fig. 1m). Similar pattern  
75 was also observed when the cells were treated with different doses of 5FU (Extended Data Fig.  
76 3a) or when another group 2-specific gene *MDM2* was used instead of *CDKN1A* (Extended  
77 Data Fig. 3b, c). Importantly, treatment with camptothecin and etoposide, two genotoxic drugs  
78 unrelated to 5FU, also induced the emergence of the *CCNE2*-high *CDKN1A*-low group 1 and  
79 the *CCNE2*-low *CDKN1A*-high group 2 (Fig. 1n). These results indicate that the heterogeneous  
80 single cell response to DNA damage is a general response to different types of genotoxic drugs.

81 According to the gene ontology database of biological pathways (GO-BP) analyses<sup>10</sup> of the top  
82 30 group-specific genes, group 1, the largest 5FU-treated group, expressed genes involved in the  
83 apoptotic pathway (Fig. 2a). In contrast, group 2, the second largest 5FU-treated group,  
84 expressed DNA damage-induced cell cycle checkpoint genes (Fig. 2a). Group 3, the group with  
85 fewest number of cells, was enriched with genes mediating stress responses (Fig. 2a). These  
86 analyses suggest that cells in groups 1, 2 and 3 assume different cell fate responses after 5FU  
87 treatment: apoptosis, cell cycle checkpoint and stress response, respectively (Fig. 2b).

88 To further substantiate these observations, we performed the DNA content analysis through flow  
89 cytometry. As predicted, 5FU treatment induced strong accumulation of a sub-G1 population,  
90 which is suggestive of cell death (Fig. 2c). The 5FU-treated cell population was partitioned into  
91 the CCNE2-high CDKN1A-low group 1 and the CCNE2-low CDKN1A-high group 2, based on  
92 their flow cytometry profiles (Fig. 2d, left). These two groups of cells exhibit different forward  
93 versus side scatter analyses values, indicating that their cell size and internal complexity are  
94 different from each other (Extended Data Fig. 3d). Roughly half of the group 1 cells appear as  
95 sub-G1 (Fig. 2d, center), indicating that this group contain many dying cells. Analyses with  
96 active caspase-3 further confirmed that all cells in the CCNE2-high group 1 indeed have  
97 activated apoptotic caspase cascade (Fig. 2e). In contrast, group 2 did not have sub-G1 cells (Fig.  
98 2d, center) and expressed relatively low levels of active caspase 3 (Fig. 2e), indicating that they  
99 are protected from apoptosis. Group 2 cells instead exhibited strong G1 arrest in both flow  
100 cytometry (Fig. 2d, center) and scRNA-seq (Fig. 2f, g) analyses. These results demonstrate that  
101 the group 1 cells were indeed undergoing apoptosis while the group 2 cells experience cell cycle  
102 arrest, as suggested by the gene ontology study (Fig. 2b). Although groups 1 and 2 exhibited  
103 different cell fate phenotypes, they experienced similar levels of DNA damage, as assessed by  
104 the  $\gamma$ -H2AX expression (Fig. 2h).

105 As 5FU dose becomes higher, the number of group 1 cells from the scRNA-seq dataset was  
106 strongly decreased (Extended Data Fig. 2c-e), although this pattern was not observed in flow  
107 cytometry (Extended Data Fig. 3a). It is possible that high levels of DNA damage accelerated  
108 apoptotic progression of the group 1 cells, producing apoptosis-associated RNA decay<sup>11</sup>.  
109 Therefore, even though the number of cells in the group 1 were high in flow cytometry (Fig. 3a),  
110 they would not be represented in the scRNA-seq data (Extended Data Fig. 2c-e).

111 The group 3 is a unique group of cells that is small but consistently detected in all experiments  
112 regardless of 5FU doses. Unlike group 1 cells, the abundance of group 3 cells did not decrease  
113 after high-dose 5FU treatments (Extended Data Fig. 2c-e). Also unlike group 2 cells, the group 3  
114 cells did not undergo cell cycle arrest (Fig. 2f, g); therefore, group 3 cells seem to have evaded  
115 both apoptosis and cell cycle checkpoint responses. As the group 3 cells express high levels of  
116 genes mediating stress response, such as *ATF3*, *FOS* and *DDIT3* (Extended Data Fig. 4a, b), it is  
117 likely that they represent a novel fate of chemoresistance. Group 3-like cells were also identified  
118 from flow cytometry as CCNE2-low and ATF3/FOS-high cells (Extended Data Fig. 4c-f).

119 Consistent with the notion that p53 pathway is central to cellular DNA damage response, all  
120 5FU-treated groups identified the p53 signaling pathway as the top Kyoto Encyclopedia of  
121 Genes and Genomes (KEGG)<sup>12</sup> pathway enriched in each group (Fig. 3a). However, intriguingly,  
122 a vast majority (93%) of these marker genes were exclusively found in a single group, and even  
123 the remaining three genes (*MDM2*, *GADD45A* and *RRM2B*; 7%) were found only in two groups  
124 but not in the third (Fig. 3b-d and Extended Data Fig. 5). For instance, *MDM2*, a well-  
125 characterized negative feedback regulator of p53, was very highly expressed in the groups 2 and  
126 3, but not in the group 1 (Fig. 3c, d; pink boxes). In contrast, *ISG15*, a recently identified positive  
127 feedback regulator of p53<sup>13</sup>, was highly expressed only in the group 1, but not in the groups 2  
128 and 3 (Fig. 3b; yellow box). It is possible that ISG15-mediated positive feedback in group 1 cells  
129 allowed for sustained p53 activation<sup>13</sup>, leading to higher p53 activity and apoptotic cell death<sup>14</sup>.  
130 MDM2-mediated negative feedback in group 2 and 3 cells may have produced pulse responses in  
131 p53 activities<sup>15</sup>, inducing non-apoptotic consequences of limited p53 activation<sup>14</sup>.

132 Using a recently assembled list of p53 target genes<sup>16</sup>, we systematically investigated the 5FU-  
133 dependent p53 target activation in different groups of cells. For most of the p53 targets, 5FU-  
134 induced expression was higher in the groups 1 and 3 than in the group 2 (Fig. 3e). For instance,  
135 many pro-apoptotic p53 target genes, such as *PMAIP1*, *FAS* and *IKBIP*, were highly expressed  
136 in the group 1 (Fig. 3f and Extended Data 6), and p53 target genes important for stress resistance,  
137 such as *ATF3*, *XPC* and *SESNI-3*, were most distinctly expressed in the group 3 (Fig. 3g and  
138 Extended Data 5c, f). Only a small number of genes, such as *CDKN1A* and *MDM2*, were  
139 expressed highly in group 2, compared to the other groups (Fig. 3f, g and Extended Data 6).  
140 Therefore, even though all 5FU-treated groups generally up-regulated p53 pathway genes, they  
141 induced a different subset of genes.

142 These results provide clear and convincing answers to all the questions we initially raised (Fig.  
143 1a-d). DNA damage induces distinct transcriptional programs leading to diversified cell fates  
144 (Fig. 1a, lower path), which includes, in addition to classical apoptosis and cell cycle checkpoints  
145 fates, a novel chemoresistant fate (Fig. 1b). Many DNA damage-induced genes, including tumor  
146 suppressor p53 targets, are differentially expressed among the different groups of cells (Fig. 1c,  
147 lower path), which is often mutually exclusive to each other (Fig. 1d, lower path). Interestingly,  
148 the DNA damage-induced transcriptome differentiation phenotype, strongly manifested in the  
149 RKO cell line, was less pronouncedly observed in other cell lines (Fig. 4). Although RKO cells  
150 display clear distinction between groups 1, 2 and 3 (Fig. 4a-f), HCT116 cells showed separation  
151 of only groups 1 and 2 (Fig. 4g-l). SW480 cells, whose DNA damage response is compromised  
152 by p53 mutation, did not exhibit significant transcriptome differentiation, and they only exhibited  
153 dose- and batch-specific transcriptome phenotypes (Fig. 4m-r). These results suggest that an  
154 intact DNA damage response is important for producing heterogeneity in transcriptome  
155 responses.

156 In summary, we provide the first snapshot of how individual cells shape their transcriptome in  
157 response to DNA damage. This work unveils new information about how different genes are  
158 expressed in different subgroups of cells sharing a specialized cell fate. In addition, by revealing  
159 a cell fate-specific transcriptome patterns, we open a new avenue for future studies to understand  
160 heterogeneous cancer cell responses to genotoxic chemotherapy, such as fractional killing and  
161 chemoresistant tumor recurrence.

162 **Acknowledgements**

163 We thank Dr. Y. Shah for colon cancer cell culture, Drs. M. Kim and C. S. Cho for  
164 advices, B. Gu, I. A. Semple and B. Kim for technical assistance, A. H. Kowalsky for comments,  
165 and Santa Cruz Biotechnology for antibodies. We also appreciate Drs. K. R. Spindler (Univ. of  
166 Michigan) and Y. Xi (Univ. of Texas at Austin) for their intellectual inputs. This work was  
167 supported by the NIH grants (R01DK102850 and R01DK114131 to J.H.L., U01HL137182 to  
168 H.M.K., and P30AG024824, P30DK034933, P30DK089503, and P30CA046592), the Chan  
169 Zuckerberg Initiative (to H.M.K.), the MCubed initiative (to J.H.L., H.M.K. and C.H.K.), Dean's  
170 Organogenesis Fellowship (to S.N.), and the AASLD Pilot Research Award (to J.H.L. and  
171 H.M.K.).

172

173 **Author contributions**

174 S.R.P. performed all experiments. S.R.P. and H.M.K. conducted computational analysis  
175 of Drop-seq data. S.N., Y.C.C., E.Y. and H.K. contributed to establishing Drop-seq experiments.  
176 Z.Z.Z. contributed to statistical analysis. L.F. and C.H.K. contributed to the analysis of flow  
177 cytometry data. H.M.K. and J.H.L. conceived and directed the project. S.R.P., H.M.K. and J.H.L.  
178 designed experiments, analyzed data and wrote the manuscript. All authors revised or  
179 commented on the manuscript and approved the final version.

180

181 **Competing interests**

182 The authors declare no competing interests.

183 **References**

184

- 185 1. Flusberg, D.A., Roux, J., Spencer, S.L. & Sorger, P.K. Cells surviving fractional killing  
186 by TRAIL exhibit transient but sustainable resistance and inflammatory phenotypes. *Mol*  
187 *Biol Cell* **24**, 2186-2200 (2013).
- 188 2. Holohan, C., Van Schaeybroeck, S., Longley, D.B. & Johnston, P.G. Cancer drug  
189 resistance: an evolving paradigm. *Nat Rev Cancer* **13**, 714-726 (2013).
- 190 3. Roos, W.P., Thomas, A.D. & Kaina, B. DNA damage and the balance between survival  
191 and death in cancer biology. *Nat Rev Cancer* **16**, 20-33 (2016).
- 192 4. Jackson, S.P. & Bartek, J. The DNA-damage response in human biology and disease.  
193 *Nature* **461**, 1071-1078 (2009).
- 194 5. Harper, J.W. & Elledge, S.J. The DNA damage response: ten years after. *Mol Cell* **28**,  
195 739-745 (2007).
- 196 6. Derks, K.W., Hoeijmakers, J.H. & Pothof, J. The DNA damage response: the omics era  
197 and its impact. *DNA Repair (Amst)* **19**, 214-220 (2014).
- 198 7. Macosko, E.Z. *et al.* Highly Parallel Genome-wide Expression Profiling of Individual  
199 Cells Using Nanoliter Droplets. *Cell* **161**, 1202-1214 (2015).
- 200 8. Becht, E. *et al.* Dimensionality reduction for visualizing single-cell data using UMAP.  
201 *Nat Biotechnol* **37**, 38-44 (2019).
- 202 9. Kho, P.S. *et al.* p53-regulated transcriptional program associated with genotoxic stress-  
203 induced apoptosis. *J Biol Chem* **279**, 21183-21192 (2004).
- 204 10. Gene Ontology, C. Gene Ontology Consortium: going forward. *Nucleic Acids Res* **43**,  
205 D1049-1056 (2015).
- 206 11. Thomas, M.P. *et al.* Apoptosis Triggers Specific, Rapid, and Global mRNA Decay with  
207 3' Uridylated Intermediates Degraded by DIS3L2. *Cell Rep* **11**, 1079-1089 (2015).
- 208 12. Kanehisa, M. & Goto, S. KEGG: kyoto encyclopedia of genes and genomes. *Nucleic*  
209 *Acids Res* **28**, 27-30 (2000).
- 210 13. Park, J.H. *et al.* Positive feedback regulation of p53 transactivity by DNA damage-  
211 induced ISG15 modification. *Nat Commun* **7**, 12513 (2016).
- 212 14. Hafner, A., Bulyk, M.L., Jambhekar, A. & Lahav, G. The multiple mechanisms that  
213 regulate p53 activity and cell fate. *Nat Rev Mol Cell Biol* **20**, 199-210 (2019).
- 214 15. Batchelor, E., Loewer, A. & Lahav, G. The ups and downs of p53: understanding protein  
215 dynamics in single cells. *Nat Rev Cancer* **9**, 371-377 (2009).

- 216 16. Fischer, M. Census and evaluation of p53 target genes. *Oncogene* **36**, 3943-3956 (2017).
- 217 17. van Dijk, D. *et al.* Recovering Gene Interactions from Single-Cell Data Using Data  
218 Diffusion. *Cell* **174**, 716-729 e727 (2018).
- 219 18. Tate, J.G. *et al.* COSMIC: the Catalogue Of Somatic Mutations In Cancer. *Nucleic Acids*  
220 *Res* **47**, D941-D947 (2019).
- 221 19. Knight, K. Intracellular Flow Cytometry Staining Protocol.  
222 [dx.doi.org/10.17504/protocols.io.tknekve](https://doi.org/10.17504/protocols.io.tknekve) (2018).
- 223 20. Dobin, A. *et al.* STAR: ultrafast universal RNA-seq aligner. *Bioinformatics* **29**, 15-21  
224 (2013).
- 225 21. Genomes Project, C. *et al.* A global reference for human genetic variation. *Nature* **526**,  
226 68-74 (2015).
- 227 22. Stuart, T. *et al.* Comprehensive integration of single cell data. *bioRxiv*  
228 <https://doi.org/10.1101/460147> (2019).
- 229 23. Satija, R., Farrell, J.A., Gennert, D., Schier, A.F. & Regev, A. Spatial reconstruction of  
230 single-cell gene expression data. *Nat Biotechnol* **33**, 495-502 (2015).
- 231 24. van der Maaten, L. & Hinton, G. Visualizing Data using t-SNE. *Journal of Machine*  
232 *Learning Research* **9**, 2579-2605 (2008).
- 233 25. Butler, A., Hoffman, P., Smibert, P., Papalexi, E. & Satija, R. Integrating single-cell  
234 transcriptomic data across different conditions, technologies, and species. *Nat Biotechnol*  
235 **36**, 411-420 (2018).
- 236 26. Haghverdi, L., Lun, A.T.L., Morgan, M.D. & Marioni, J.C. Batch effects in single-cell  
237 RNA-sequencing data are corrected by matching mutual nearest neighbors. *Nat*  
238 *Biotechnol* **36**, 421-427 (2018).
- 239 27. Welch, J. *et al.* Integrative inference of brain cell similarities and differences from single-  
240 cell genomics. *bioRxiv*, <https://doi.org/10.1101/459891> (2019).
- 241 28. Nestorowa, S. *et al.* A single-cell resolution map of mouse hematopoietic stem and  
242 progenitor cell differentiation. *Blood* **128**, e20-31 (2016).
- 243 29. Yu, G., Wang, L.G., Han, Y. & He, Q.Y. clusterProfiler: an R package for comparing  
244 biological themes among gene clusters. *OMICS* **16**, 284-287 (2012).
- 245
- 246

247 **Figure Legends**

248

249 **Fig. 1 | 5FU treatment induces heterogeneous transcriptome response to DNA damage.**

250 **a-d**, Diagrams depicting main questions in this paper. **e-h**, t-SNE and UMAP manifolds colored  
251 with 5FU dose (**e, f**) and group identity (**g, h**) information. Group identity was determined  
252 through high-dimensional clustering of scRNA-seq data. Untreated cells fell into a single group  
253 (group 0), while 5FU-treated cells were clustered in three different groups (groups 1-3). **i**, Heat  
254 map analysis depicting expression of top 20 markers for each of the four groups identified at the  
255 top. **j, k**, Scatterplot of indicated mRNA expression in single cells, calculated from Markov  
256 affinity-based graph imputation of cells (MAGIC)<sup>17</sup>. Each dot represents an individual cell  
257 colored with dose of 5FU treatment (**j**) or its group identity (**k**). **l-n**, Flow cytometry analysis of  
258 indicated protein abundance in single cells. Horizontal and vertical lines indicate background  
259 fluorescence levels determined from unstained cells.

260 **Fig. 2 | Single cell transcriptome profile dictates the fate of cells after DNA damage.**

261 **a**, Gene ontology-biological pathways (GO-BP) enrichment analysis of the top 30 markers for  
262 each of the three 5FU-treated groups. Top 5 GO-BP terms, ordered by adjusted P values (P.adj),  
263 were summarized in the table. FC, fold enrichment. **b**, Schematic model depicting 5FU-induced  
264 transcriptomic responses and their relationship to cell fate. **c**, DNA content analysis of control  
265 (left) and 5FU-treated (center) cells in flow cytometry. The two graphs were merged for a direct  
266 comparison (right). **d**, Using data from the 5FU-treated cells (center panel in **c**), cells in the  
267 groups 1 and 2 were separately analyzed for their DNA content. Gating scheme was shown in the  
268 scatterplot of CCNE2 and CDKN1A (left). DNA content of cells were analyzed in each gate  
269 representing the group 1 (blue, center) and 2 (red, center). Stages of cell cycle were estimated  
270 through the DNA content analysis (center), and used to color single cells in the scatterplot of  
271 CCNE2 and CDKN1A (right). **e, h**, Flow cytometry analysis of indicated protein expression.  
272 Horizontal and vertical lines indicate background fluorescence level determined from unstained  
273 cells. **f**, The stage of cell cycle was estimated through analyzing expression of S and G2/M  
274 phase-specific markers. Approximate boundaries for each group are marked by a dotted line. **g**,  
275 Proportion of cells in each group classified into different cell cycle stages.

276 **Fig. 3 | Unique expression patterns of p53 pathway genes according to the group identities**  
277 **of single cells.**

278 **a**, Pathway enrichment analysis using the Kyoto Encyclopedia of Genes and Genomes (KEGG)  
279 database identified the p53 pathway genes as the most important feature distinguishing the three  
280 5FU-induced groups. Counts in parentheses are a subset of the top 30 genes whose involvement  
281 in p53 pathway was documented in the literature but was not included in the KEGG database.  
282 P.adj, adjusted P value; FC, fold enrichment. **b-d**, Dot plot of the p53 pathway genes that were in  
283 the top 30 markers for groups 1 (**b**), 2 (**c**) and 3 (**d**). The size of the dot reflects the percentage of  
284 cells expressing the markers, while the color encodes average expression levels across all cells  
285 within the group (blue is high). *CNOT4* and *SESNs* are not in the top 30 markers but were  
286 significantly upregulated in the group 3. **e-g**, Average expression level of individual p53 target  
287 genes in each group, normalized by their averaged expression in all cells, are presented in box



288 plot (e) and correlation scatterplots (f, g). Total 89 p53 target genes were analyzed. Each dot in  
289 the scatterplots represents an individual p53 target gene.

290 **Fig. 4. | Patterns of single cell DNA damage response across different colon cancer cell**  
291 **lines.**

292 UMAP manifolds and feature plots of 5FU-treated RKO (a-e), HCT116 (g-k) and SW480 (m-q)  
293 cells. UMAP manifolds were colored by 5FU treatment dose (a, g, m) or estimated cell cycle  
294 phase (b, h, n). Feature plots of group-specific genes were generated for *CCNE2* (group 1; c, i,  
295 o), *CDKN1A* (group 2; d, j, p) and *ATF3* (group 3; e, k, q). Models of 5FU-induced  
296 transcriptome differentiation in RKO (f), HCT116 (l) and SW480 (r) cells are illustrated.

297

## 298 **Methods**

299

300 **Cell culture.** RKO (CRL-1577), HCT116 (CCL-247) and SW480 (CCL-228) cells were  
301 obtained from the American Type Culture Collection (ATCC) and maintained in Dulbecco's  
302 Modified Eagle Medium (DMEM; Fisher Scientific, 11965-092, Gibco) with 10% fetal bovine  
303 serum (FBS, Sigma, F4135) and 1% penicillin-streptomycin (Fisher Scientific, 15140122) at  
304 37°C and 5% CO<sub>2</sub>. Upon receipt, each cell line was subcultured for fewer than 6 months prior to  
305 initiation of the described experiments. All cell lines were negative for Mycoplasma  
306 contamination in PCR-based analysis using the following primers: F: 5'-  
307 GTGGGGAGCAAA(C/T)AGGATTAGA-3', R: 5'-GGCATGATGATTTGACGTC(A/G)T-3'.  
308 In addition, cell lines were again authenticated through sequence comparison with COSMIC  
309 database (RKO and HCT116)<sup>18</sup> and through profiling 15 autosomal short tandem repeat (STR)  
310 loci and the gender identity locus (SW480, Genetica Cell Line Testing).

311 **DNA damage treatment.** Cells were seeded at 100 cells/mL in DMEM with FBS. When the  
312 cells reached 70% confluence, DNA damage was induced by treatments with 5-fluorouracil  
313 (10µM, 50µM and 200µM, as indicated) for Drop-seq and flow cytometry experiments.  
314 Etoposide (200µM) or camptothecin (200µM) were also treated for 24 hours for flow cytometry  
315 experiments. Control cells were harvested before the DNA damage treatment for all experiments.

316 For Drop-seq, individual cell lines with indicated treatment were harvested after TrypLE Express  
317 digestion (ThermoFisher, 12605010, Gibco). After centrifugation at 3500 rpm for 5 min, cells  
318 were washed in Dulbecco's phosphate-buffered saline (DPBS; Fisher Scientific, 14190250) and  
319 centrifuged again. The cells were then resuspended in DPBS containing 0.1% bovine serum  
320 albumins (Sigma, A8806). Then the cells were filtered through a 40-micron cell strainer (VWR  
321 21008949) and diluted to the concentration of 100,000 cell/ml. Cells from three different cell  
322 lines were then mixed with each other right before being subjected to the Drop-seq experiment.  
323 The cells for flow cytometry were harvested using the same protocol and diluted into DPBS  
324 before the fixation.

325 **Drop-seq and library preparation.** We performed Drop-seq through the described protocol  
326 (Macosko et al., 2015). We mixed equal numbers of cells from three different cell lines  
327 (approximately 40,000 cells for each cell line) for one loading of 120,000 cells for Drop-seq.  
328 Briefly, three pump-controlled syringes with cell suspension (100,000 cells/ml, total 1.2 ml per  
329 run), barcoded beads (Chemgenes, MACOSKO-2011-10) in lysis buffer (400mM Tris pH 7.5,  
330 40mM EDTA, 12% Ficoll PM-400, 0.4% Sarkosyl and 100mM DTT; 100,000 beads/ml, total 1.2  
331 ml per run), and droplet generation oil (Bio-rad, 1864006; 7 ml per run), were connected to a  
332 microfluidics device (FlowJEM) under microscope supervision. During droplet generation, we  
333 set the cell and bead flow speed at 2,000 µl/hr, and the oil speed at 7,500 µl/hr. The droplets were  
334 collected into 50 ml falcon tubes during average time of 25 to 30 mins. Following droplet  
335 breakage, the total beads were collected and washed in 6X SSC (diluted from 20X SSC,  
336 Invitrogen, #15557044). Excess bead primers without RNA molecules were removed by the  
337 treatment of Exonuclease I (NEB, NEBM0293S). Then, we performed first strand cDNA  
338 synthesis using Template Switch Oligo (TSO) on beads. PCR cycling followed the original  
339 Drop-seq protocol (Macosko et al., 2015). The resultant PCR products were extracted using  
340 AMPure XP beads (Beckman Coulter, A63881). After this step, the number of Single-cell  
341 Transcriptomes Attached to MicroParticles (STAMPs) per run was estimated by the PCR product

342 concentration. We used the samples that contained more than 400 STAMPs for the secondary  
343 PCR using the TSO PCR primer in order to amplify the cDNA. The resulting full-length  
344 enriched cDNA library was processed into the sequencing library using the Nextera XT DNA  
345 Library Preparation Kit (Illumina, FC-131-1096). The quality of the libraries was inspected by  
346 size and concentration by agarose gel electrophoresis before pooling the libraries. They were  
347 evaluated again with the BioAnalyzer in the UM Sequencing Core. A total of 10 sets of cDNA  
348 libraries from Drop-seq runs were analyzed. The library pools with the average size of 450 bp  
349 were sequenced using Illumina HiSeq-4000 High-Output, with asymmetrical reads of 26 bp ×  
350 110 bp.

351 **Flow cytometry.** Cells were prepared as described above in DNA damage treatment section.  
352 Cells were washed with DPBS twice and resuspended in 500 µl DPBS. Then, the cells were  
353 processed according to the Intracellular Flow Cytometry Staining Protocol provided by  
354 BioLegend<sup>19</sup> with minor modifications. In brief, cells were fixed in Fixation Buffer (BioLegend,  
355 420801) for 20 minutes at room temperature in the dark and washed in Cell Staining Buffer  
356 (BioLegend Cat. No.420201) twice. Cells were then washed twice with 1X Intracellular Staining  
357 Perm Wash Buffer (BioLegend Cat. No.421002) for permeabilization and resuspended for  
358 antibody incubation. The primary antibodies (1 µl/sample) were applied to the Perm/Wash buffer  
359 and incubated with cells for 1 hour at room temperature in dark. p21 (#2947), MDM2 (#86934),  
360 Cleaved caspase 3 (#9661) and p-H2AX (#2577) are from Cell Signaling, and cyclin E2 (sc-  
361 28351), ATF-3 (sc-518032) and c-fos (sc-166940) are from Santa Cruz Biotechnology. The  
362 primary antibodies were then washed out with the Perm/Wash buffer. The fluorescence-  
363 conjugated secondary antibodies (Alexa Fluor 488: A-21206, Invitrogen; Alexa Fluor 594: A-  
364 11032, Invitrogen) were added to the Perm/Wash buffer (1 µl/sample) and incubated 1 hour at  
365 room temperature in the dark. DAPI (D21490, Invitrogen) was added to the secondary antibody  
366 solution when necessary. After final wash with Perm/Wash buffer, cells were resuspended in 500  
367 µl of Cell Staining Buffer and examined in Bio-Rad ZE5 or Fortessa Cell Analyzers. Data  
368 analysis was done using FlowJo software.

369 **Drop-seq data processing and cell line de-multiplexing.** We processed raw reads following the  
370 instructions described in the Drop-seq Laboratory Protocol v3 using DropSeqTools (v1.13)<sup>7</sup>.  
371 Reads were aligned to hg19 genome using STAR (v.2.6.0a)<sup>20</sup> following the default  
372 DropSeqTools pipeline. The aligned reads were further processed using *popsicle dsc-pileup* to  
373 produce the profiles of Unique Molecular Identifier (UMI) profiles and pileups of reads  
374 overlapping with polymorphic variants with minor allele frequency (MAF) > 1% from 1000  
375 Genomes Phase 3 panel<sup>21</sup>. The UMI profiles were examined to produce the knee plot, which  
376 displays the empirical cumulative distribution of UMIs across all barcoded droplets (Figure S1A,  
377 center). We used a UMI count 800 as a cutoff to determine the droplets to consider for the  
378 downstream analysis. As a result, 13,801 barcoded droplets passed the UMI cutoff.

379 The deconvolution of cell types was performed using *popsicle freemuxlet*, by clustering them into  
380 3 multiplexed samples (with --nsample 3) using variant-overlapping reads while detecting  
381 doublets with default parameters for each batch. The genetic identities of each cluster were  
382 determined by calculating the likelihood of sequence reads given genotypes from the COSMIC  
383 database<sup>18</sup> for RKO and HCT116. Because SW480 genotypes were unavailable in COSMIC, the  
384 cluster with no matching samples was assumed to be SW480. The inferred genotype likelihoods  
385 for each sample were merged across 10 batches, and the merged genotype likelihoods were used  
386 to confirm the identity of droplets using *popsicle demuxlet*. 11,259 droplets were confidently

387 inferred as singlets in both *freemuxlet* and *demuxlet* and used for the subsequent analysis. In the  
388 downstream analysis (see below), droplets containing aberrantly high content of mitochondrial  
389 mRNAs were further eliminated (Figure S1A, right); therefore, the number of droplets actually  
390 used for the analysis was reduced to 10,421 (Figure S1A, left). The digital expression matrix of  
391 these droplets was produced using *popsicle plp-make-dge-matrix*, using the same gene annotation  
392 database (in GTF format) used for *DropSeqTools*.

393 **Cell clustering and data visualization.** The digital expression matrix was processed to Seurat  
394 v3<sup>22</sup> following the “standard processing workflow” in the tutorial, except for a few changes.  
395 First, we used 11% (RKO and SW480) and 21% (HCT116) as the threshold to filter out droplets  
396 with aberrantly high mitochondrial reads based on the cell line-specific inspection of QC metrics  
397 (Figure S1A, right). Second, we used 10 principal components for all manifold learning and  
398 clustering analyses to maintain consistency. Third, when finding variable genes, we chose the top  
399 genes based on average expression and dispersion (selection.method = “mean.var.plot”) to  
400 maintain consistency with analysis from Seurat v2<sup>23</sup>. Using the revised standard workflow, we  
401 computed principal components and 2-dimensional t-SNE<sup>24</sup> and UMAP<sup>8</sup> manifolds in the  
402 merged dataset, as well as dataset stratified into RKO, HCT116, and SW480 as identified by  
403 *freemuxlet* and *demuxlet*.

404 Clustering was performed using the shared nearest neighbor modularity optimization  
405 implemented in Seurat’s *FindClusters* function using resolution parameter as 0.2. We observed  
406 that batch effects do exist, even though they were smaller than the biological effect of separating  
407 the four primary clusters. For example, when using resolution higher than 0.2, we observed  
408 additional clusters almost exclusive for specific batches. To correct for these batch effects, we  
409 applied *CCA*<sup>25</sup>, *MNN*<sup>26</sup>, and *liger*<sup>27</sup>. However, in our experimental settings where technical  
410 batches and biological effects (5FU dose) can confound each other, all these methods failed to  
411 correct for (or over-corrected) batch effects to examine the biological differences more clearly  
412 than uncorrected data. Therefore, we used uncorrected data in the subsequent analyses.

413 Heatmaps were produced using *DoHeatmap* function in Seurat using the top 20 genes with  
414 highest log-fold changes identified from differentially expressed genes identified by  
415 *FindAllMarkers* function with default parameters. Violin plots, dot plots, and feature plots (gene  
416 expression per cell in the manifold space) were generated using *VlnPlot*, *DotPlot*, *FeaturePlot*  
417 functions, respectively. Cell cycles were inferred using *CellCycleScoring* function in Seurat  
418 using the recommended set of cell-cycle specific genes<sup>28</sup>.

419 **Pathway enrichment analysis.** Differentially expressed genes by clusters were applied to  
420 clusterProfiler for pathway enrichment analysis<sup>29</sup>. The top 30 differentially expressed genes  
421 (based on fold-enrichment) were identified for each cluster using *FindAllMarkers* function in  
422 Seurat, and the pathway enrichment analysis were performed using *enrichGO* and *enrichKEGG*  
423 functions, respectively, with significance p-value cutoff 0.05. When the exact same list of genes  
424 was identified in multiple GO terms, only the term with the lowest p-value was presented in the  
425 table.

426 **Imputation of single cell expression.** We performed imputation of the data using *magic* package  
427 with the default parameter<sup>17</sup> to detect the relationship of genes of interest. The scatterplots and  
428 feature plots of imputed data were visualized using customized R scripts with *ggplot2*.

429

## 430 Extended Data Figure Legends

431

432 **Extended Data Fig. 1 | scRNA-seq captured cell line identity and DNA damage response. a,**  
433 **b,** The numbers of cells captured through Drop-seq, stratified by batches (**a**, left) and 5FU  
434 treatment doses (**b**). RKO, HCT116 and SW480 cell line identities were determined through  
435 *demuxlet* and *freemuxlet* software. Knee plot (**a**, center) displays the empirical cumulative  
436 distribution of UMIs across barcoded droplets in all batches. Violin plot (**a**, right) shows the  
437 distribution of mitochondrial RNA ratio (%) across barcoded droplets in all cell lines. Cells with  
438 >800 UMIs (dotted line in the center panel of **a**), <11% (RKO and SW480) or <21% (HCT116)  
439 mitochondrial mRNA reads (dotted lines in the right panel of **a**), and confident inference of cell  
440 line identity were included in the analysis. **c**, PCA plot (left) and t-SNE (center) and UMAP  
441 (right) manifolds of all three cell lines colored with cell line identity. **d**, **e**, t-SNE (**d**) and UMAP  
442 (**e**) manifolds of all cell lines colored with 5FU dose. **f-h**, Violin plots (upper) and dot plots  
443 (lower) of the indicated DNA damage responsive genes after 5FU treatment. In the dot plots, the  
444 size of the dot reflects the percentage of cells expressing the markers, while the color encodes the  
445 average expression levels across all cells within the group (blue is high). Each cell line was  
446 analyzed separately.

447 **Extended Data Fig. 2 | 5FU-induced differentiation of single cell transcriptome in RKO**  
448 **cells. a,** PCA plot of RKO cells colored with 5FU dose (left) and group identity assigned by  
449 high-dimensional clustering of scRNA-seq data (right). **b**, t-SNE and UMAP manifolds colored  
450 with batch information. Control experiments were performed in quadruplicate (0A-0D), while  
451 experiments using each 5FU dose was performed in duplicate (10A, 10B, 50A, 50B, 200A and  
452 200B). Approximate boundaries for the groups 0, 1, 2 and 3 are marked by a dotted line. **c-e**,  
453 Distribution of cells in each dose (**c**) or batch (**d**, **e**) into the group identity assigned by clustering  
454 analysis.

455 **Extended Data Fig. 3 | Flow cytometry confirms 5FU-induced differentiation of group 1**  
456 **and group 2. a-c,** Flow cytometry analysis of indicated protein abundance in single cells.  
457 Horizontal and vertical lines indicate background fluorescence levels determined from unstained  
458 cells. **d**, The groups 1 and 2 were gated as a CCNE2-high CDKN1A-low population and a  
459 CCNE2-low CDKN1A-high population, respectively (left, from Fig. 1m), and their forward  
460 versus side scatter characteristics (FSC/SSC) were analyzed (right).

461 **Extended Data Fig. 4 | Group 3 was observed in both scRNA-seq and flow cytometry**  
462 **analyses. a,** Violin plots of the group 3-specific marker genes generated using scaled data  
463 without imputation. **b**, Gene expression feature plots of the group 3-specific marker genes. The  
464 location of the group 3 is identified by localized expression of these markers, indicated with  
465 purple arrows. **c**, **d**, Scatterplot of imputed gene expression in single cells. Each dot represents  
466 data from a single cell colored with its group identity (left) dose of 5FU treatment (center) or  
467 estimated cell cycle phase (right). **e**, **f**, Flow cytometry analysis of indicated protein expression.  
468 Cells were subjected to indicated treatments for 24 hours. Horizontal and vertical lines indicate  
469 background fluorescence level determined from unstained cells. Areas for the putative groups 0-  
470 3 were indicated with corresponding numbers.

471 **Extended Data Fig. 5 | 5FU response of p53 pathway genes in different groups of cells.**  
472 Violin plots of the p53 pathway genes that are in the top 30 markers for the groups 1 (**a**, **d**), 2 (**b**,

473 **e)** and 3 (**c, f**), using imputed data (**a-c**) and scaled raw data (**d-f**). *SESNI-3* are not in the top 30  
474 markers but were significantly upregulated in the Stress group.

475 **Extended Data Fig. 6 | Differential expression of p53 targets according to the group**  
476 **identities of single cells.** Scatterplot of indicated gene expression in single cells. Each dot  
477 represents individual cell colored with its group identity (**a**) or dose of 5FU treatment (**b**).

478

479 **Extended Data Table Legend**

480

481 **Extended Data Table 1 | Top markers for individual RKO cell groups isolated by clustering**  
482 **analysis.**

483 Top 30 up-regulated genes for groups 0, 1, 2 and 3: cluster, group identity; gene, gene name;  
484 p\_val, P value; p\_val\_adj, adjusted P value; avg\_logFC, average fold enrichment. For the  
485 Untreated group, only 21 genes appeared significantly upregulated compared to the other groups.  
486 For all 5FU-treated groups, all 30 genes were significantly upregulated.

**Fig 1. Park et al.**

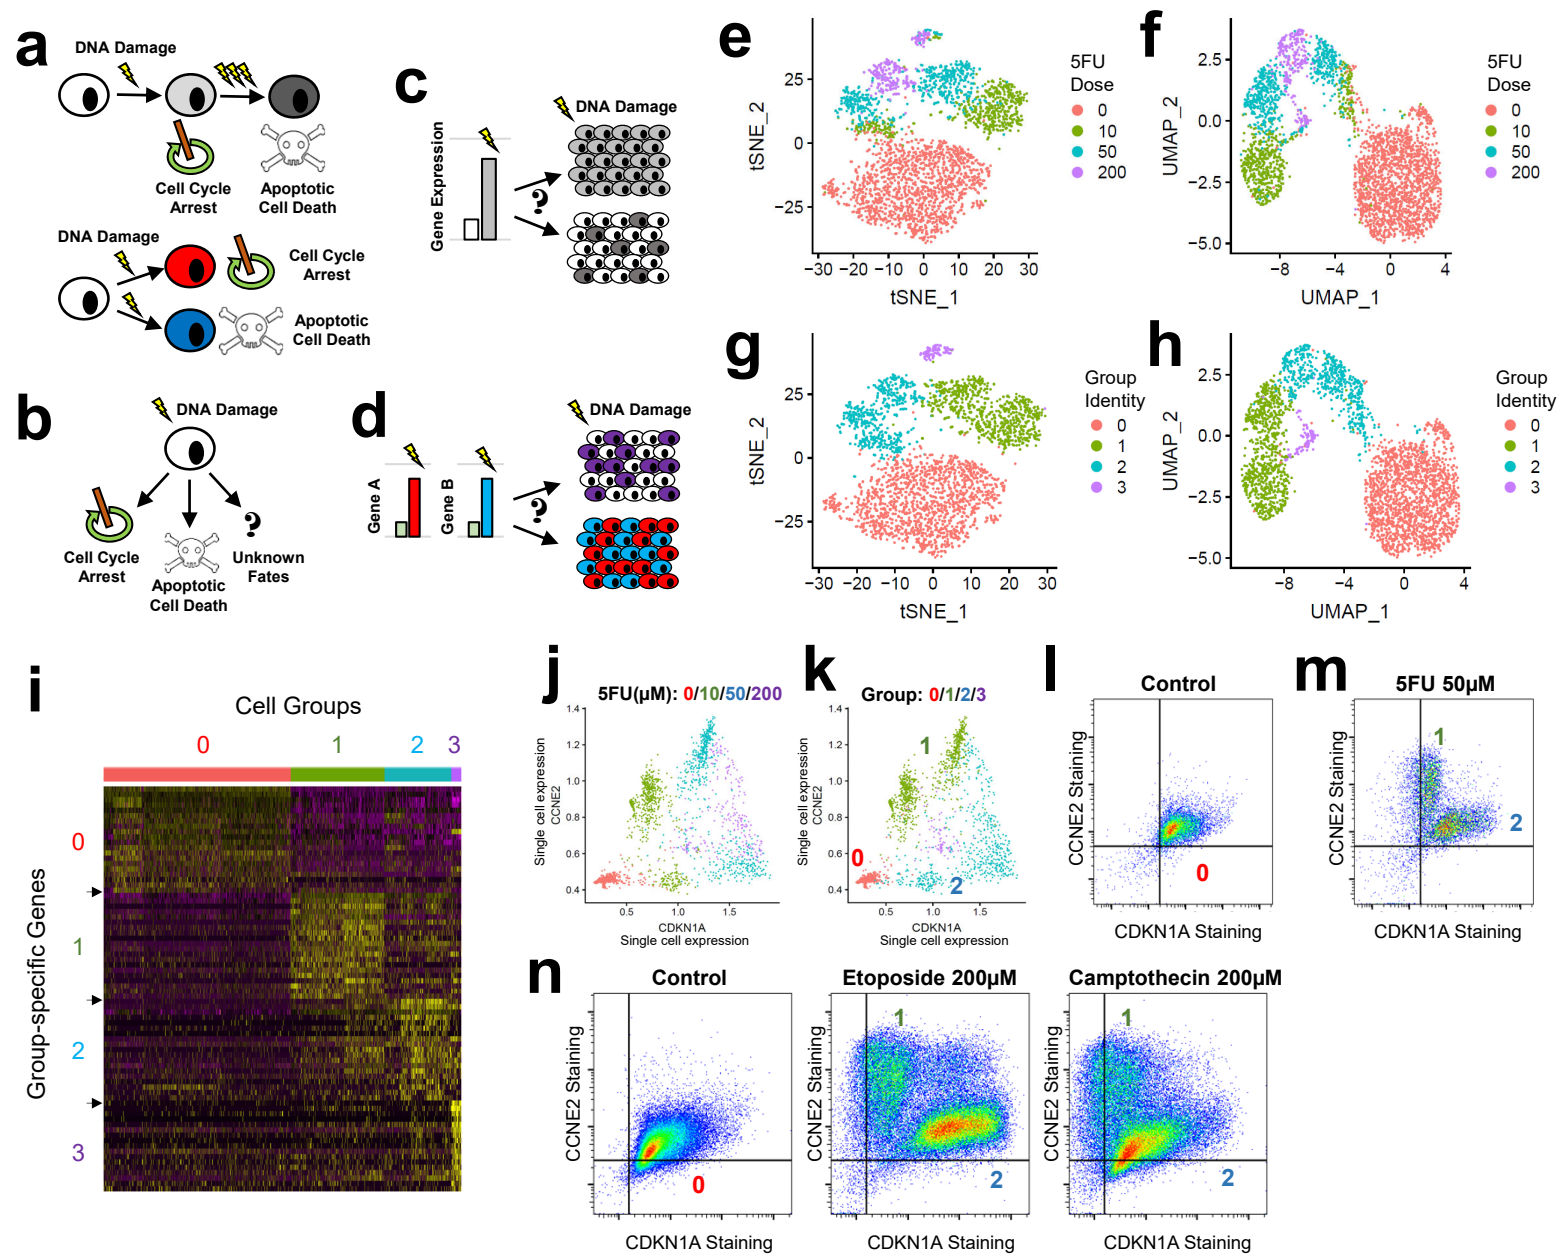



**Fig 2. Park et al.**

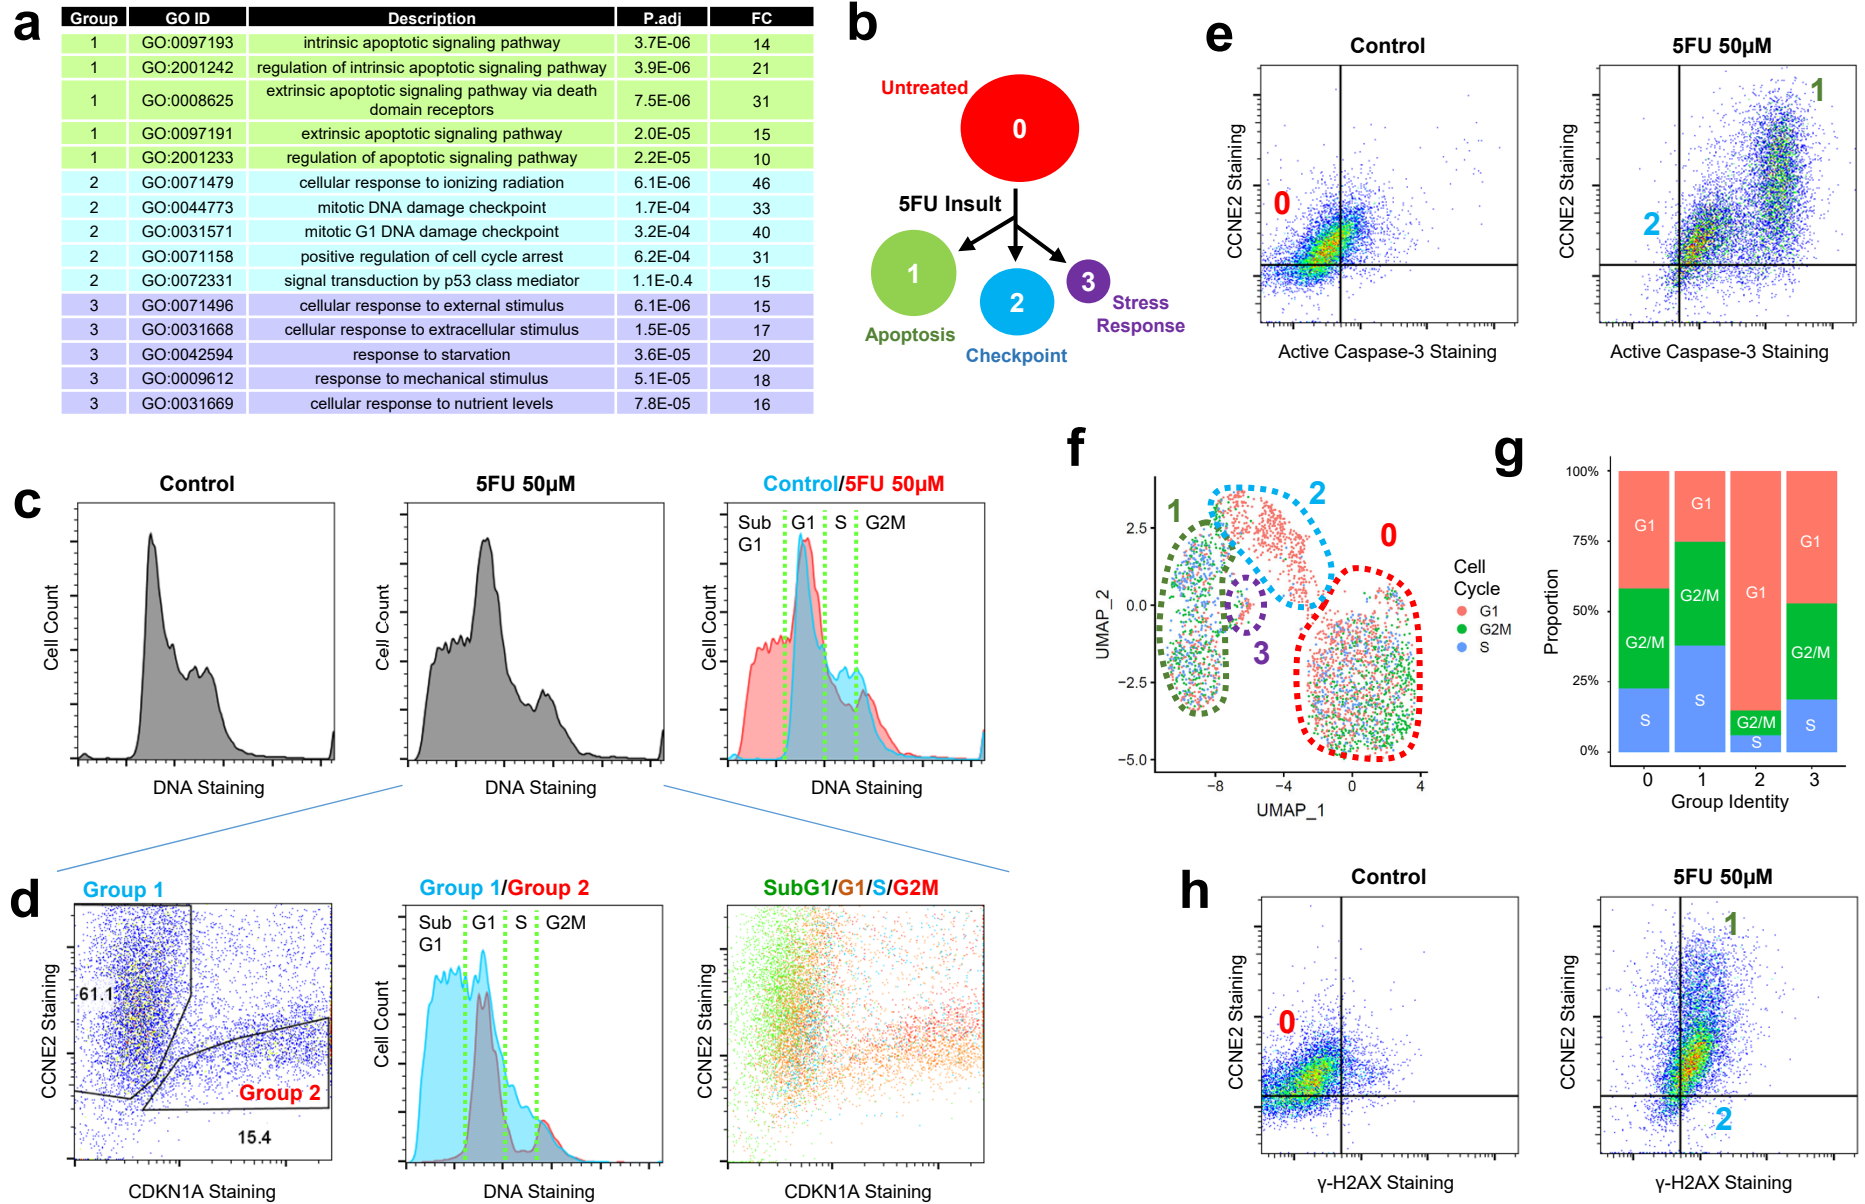

Fig 3. Park et al.

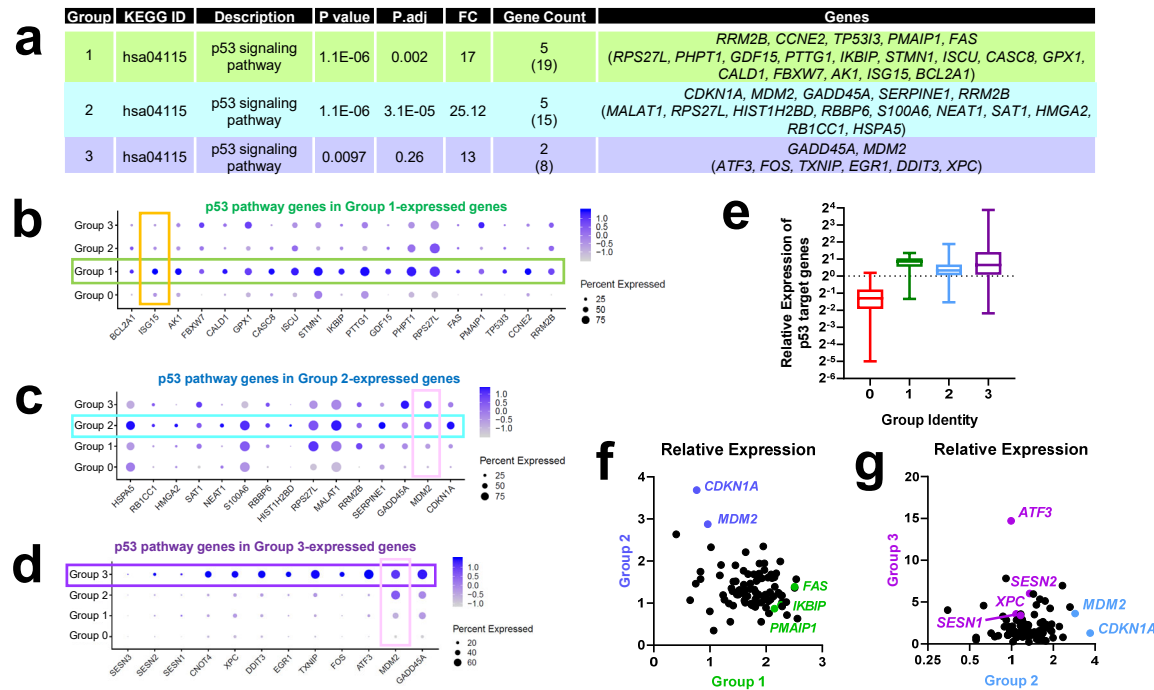

Fig 4. Park et al.

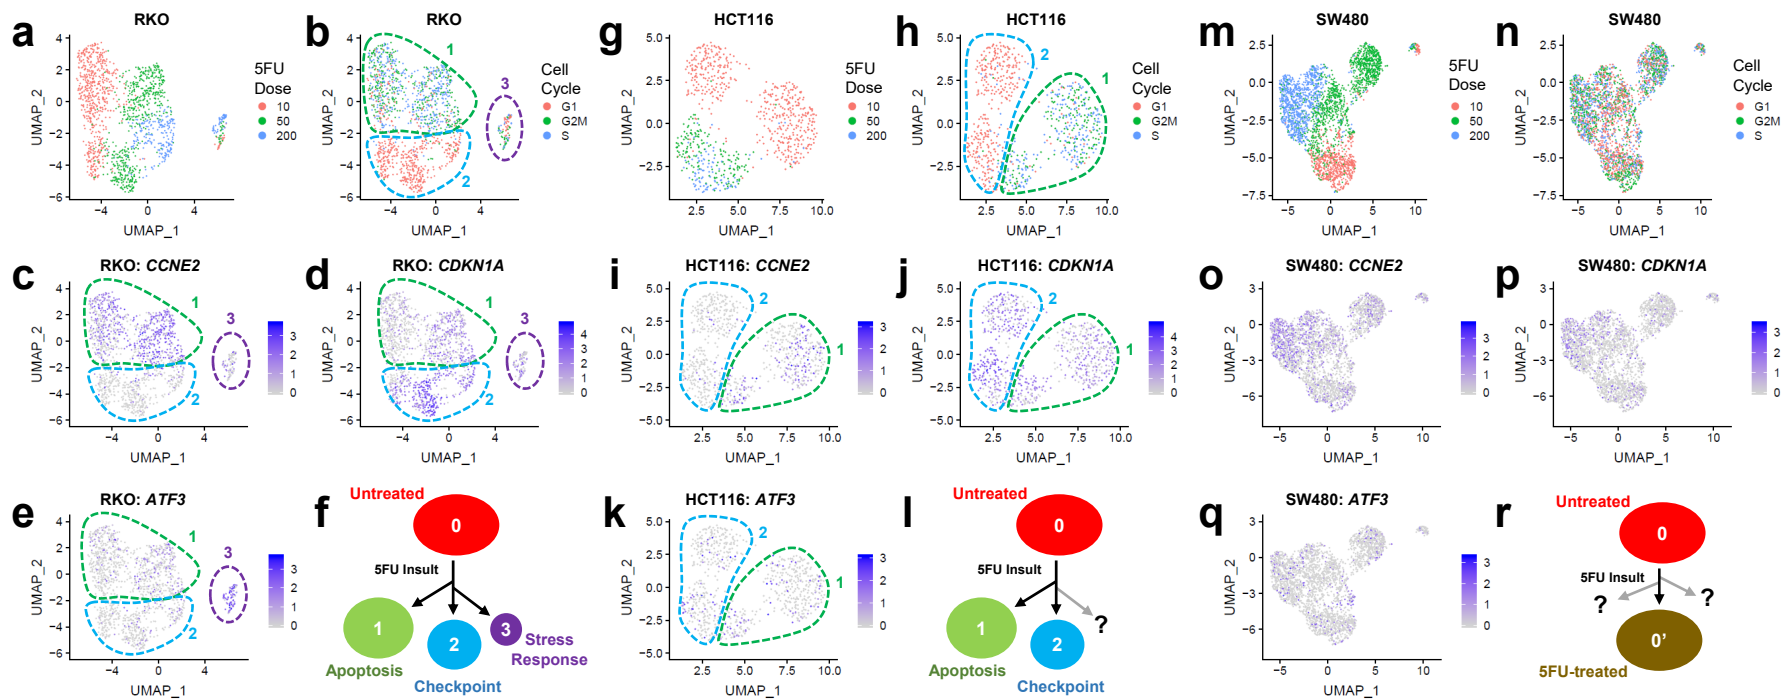

# Extended Data Fig 1. Park et al.

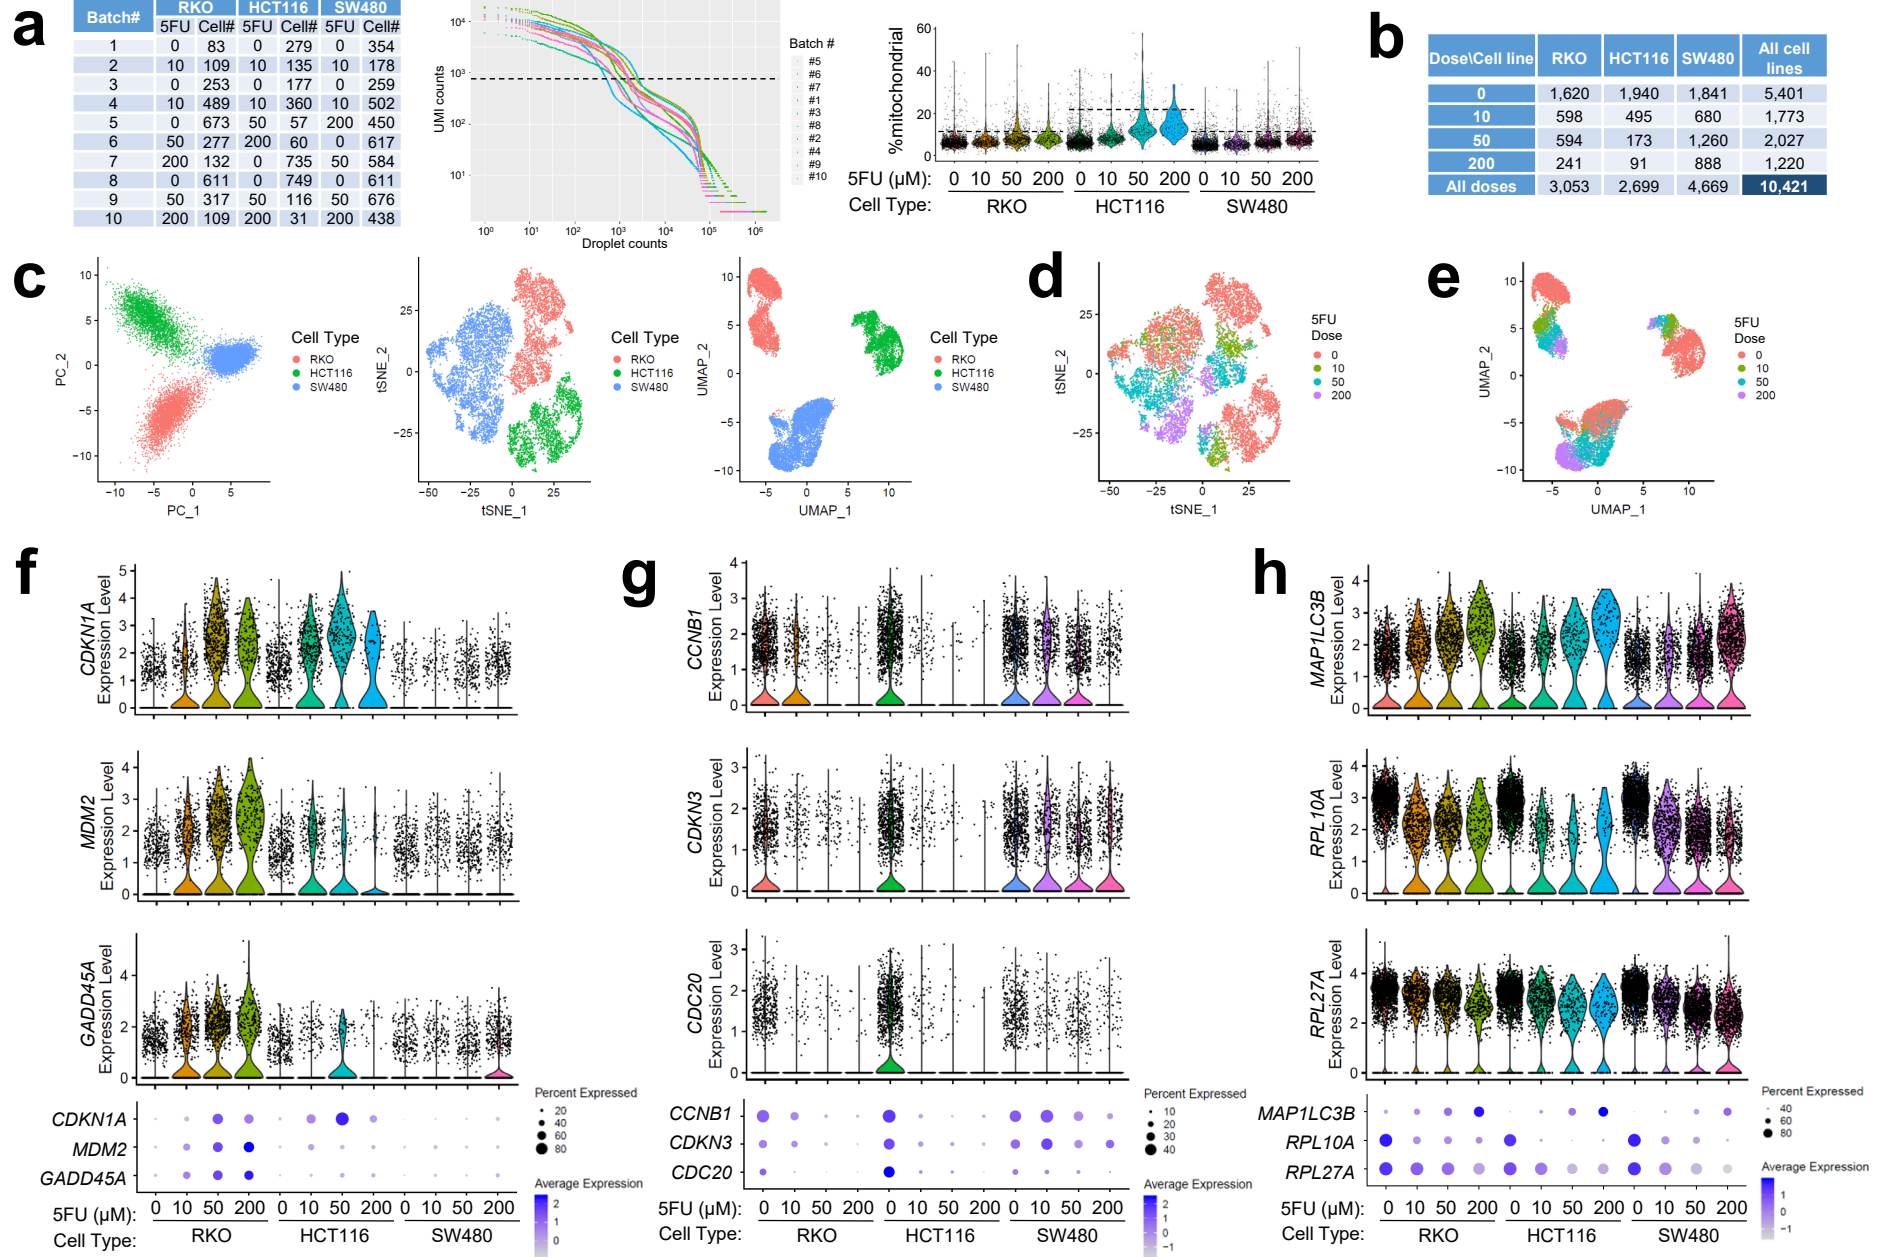

Extended Data Fig 2. Park et al.

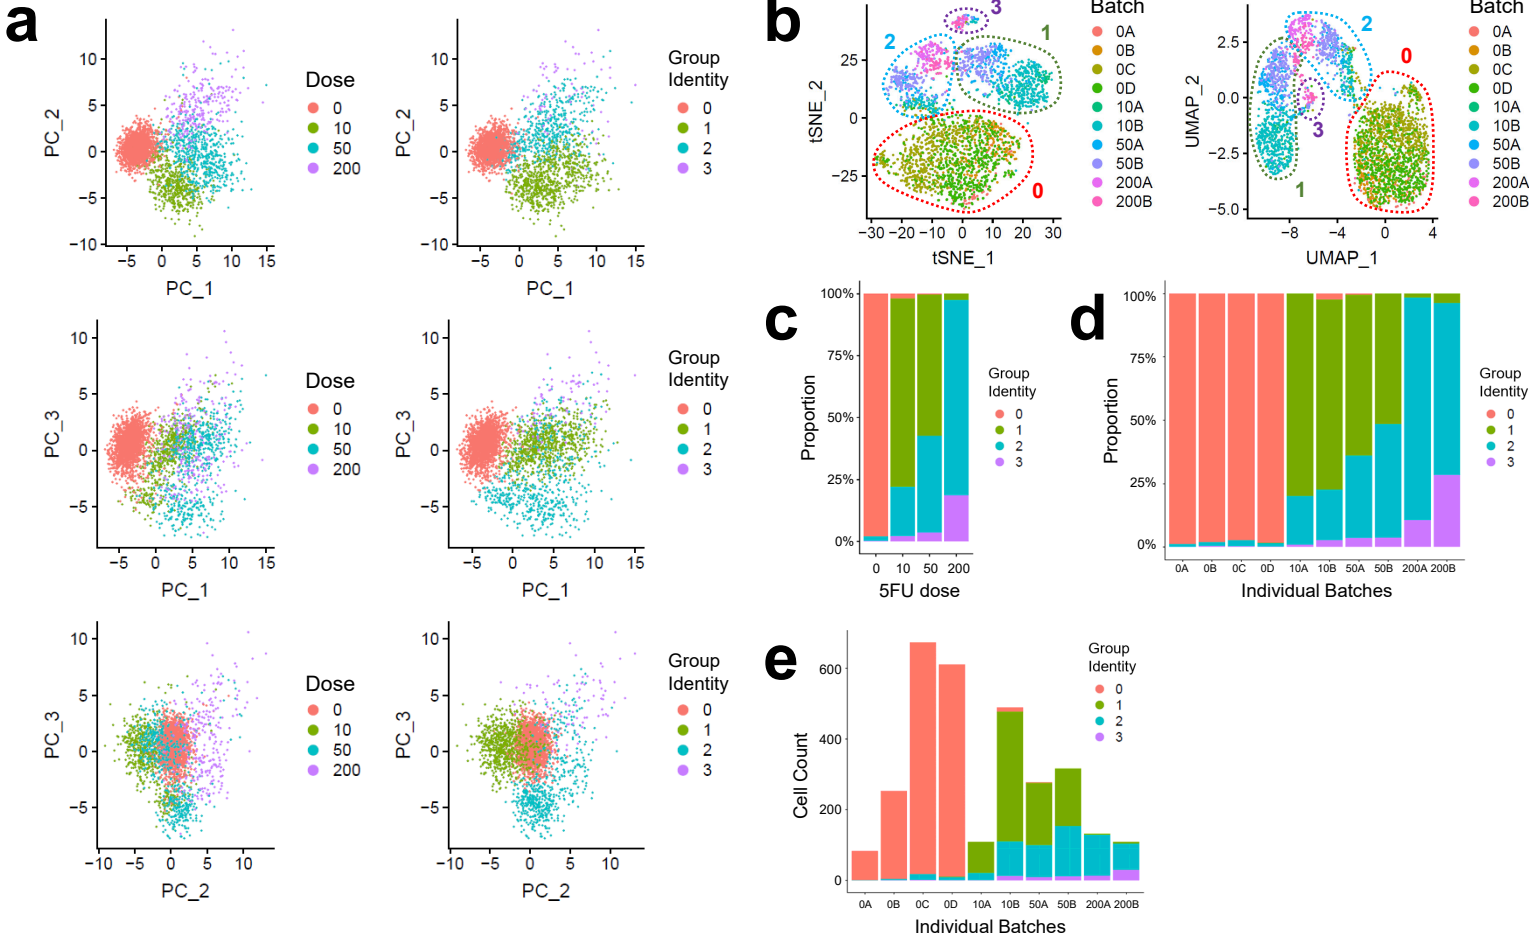

Extended Data Fig 3. Park et al.

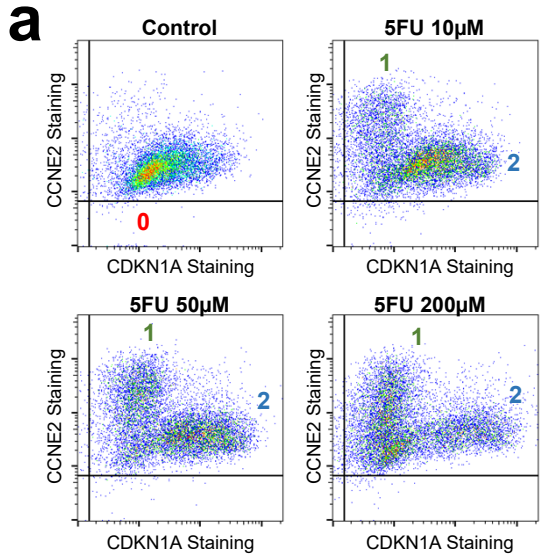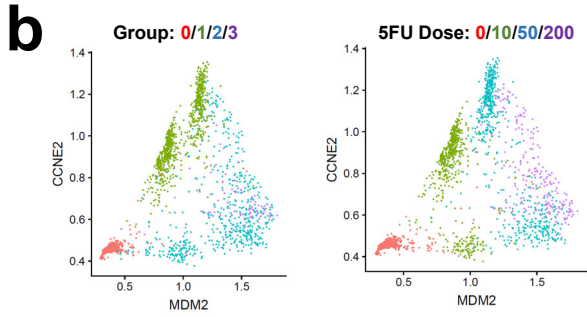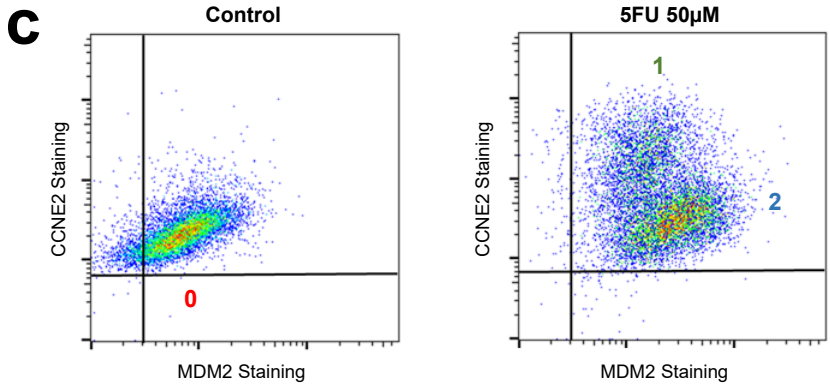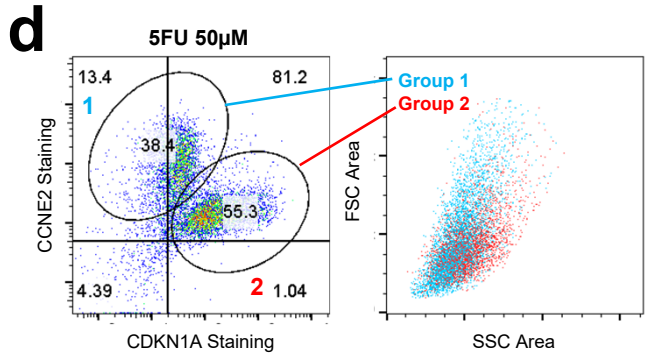

Extended Data Fig 4. Park et al.

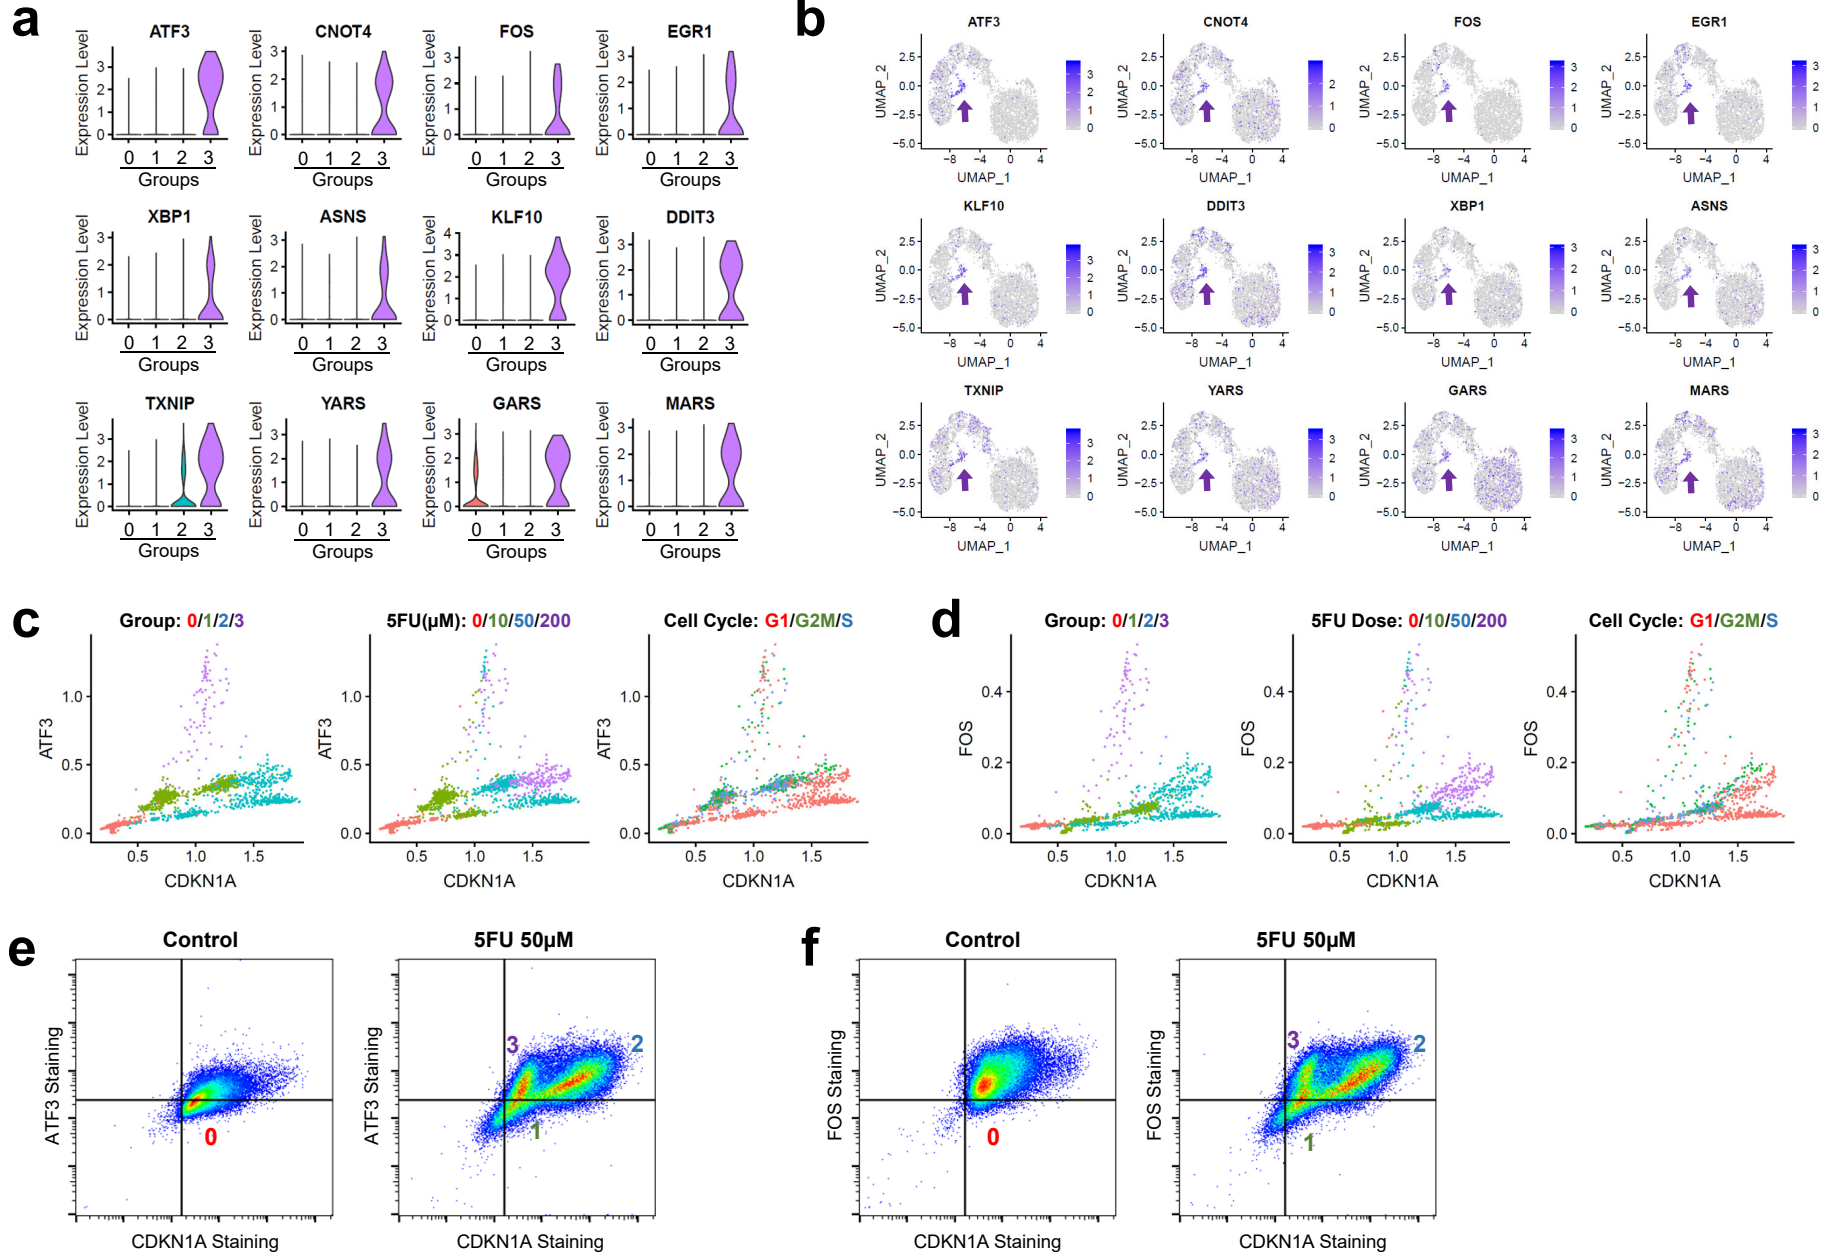

# Extended Data Fig 5. Park et al.

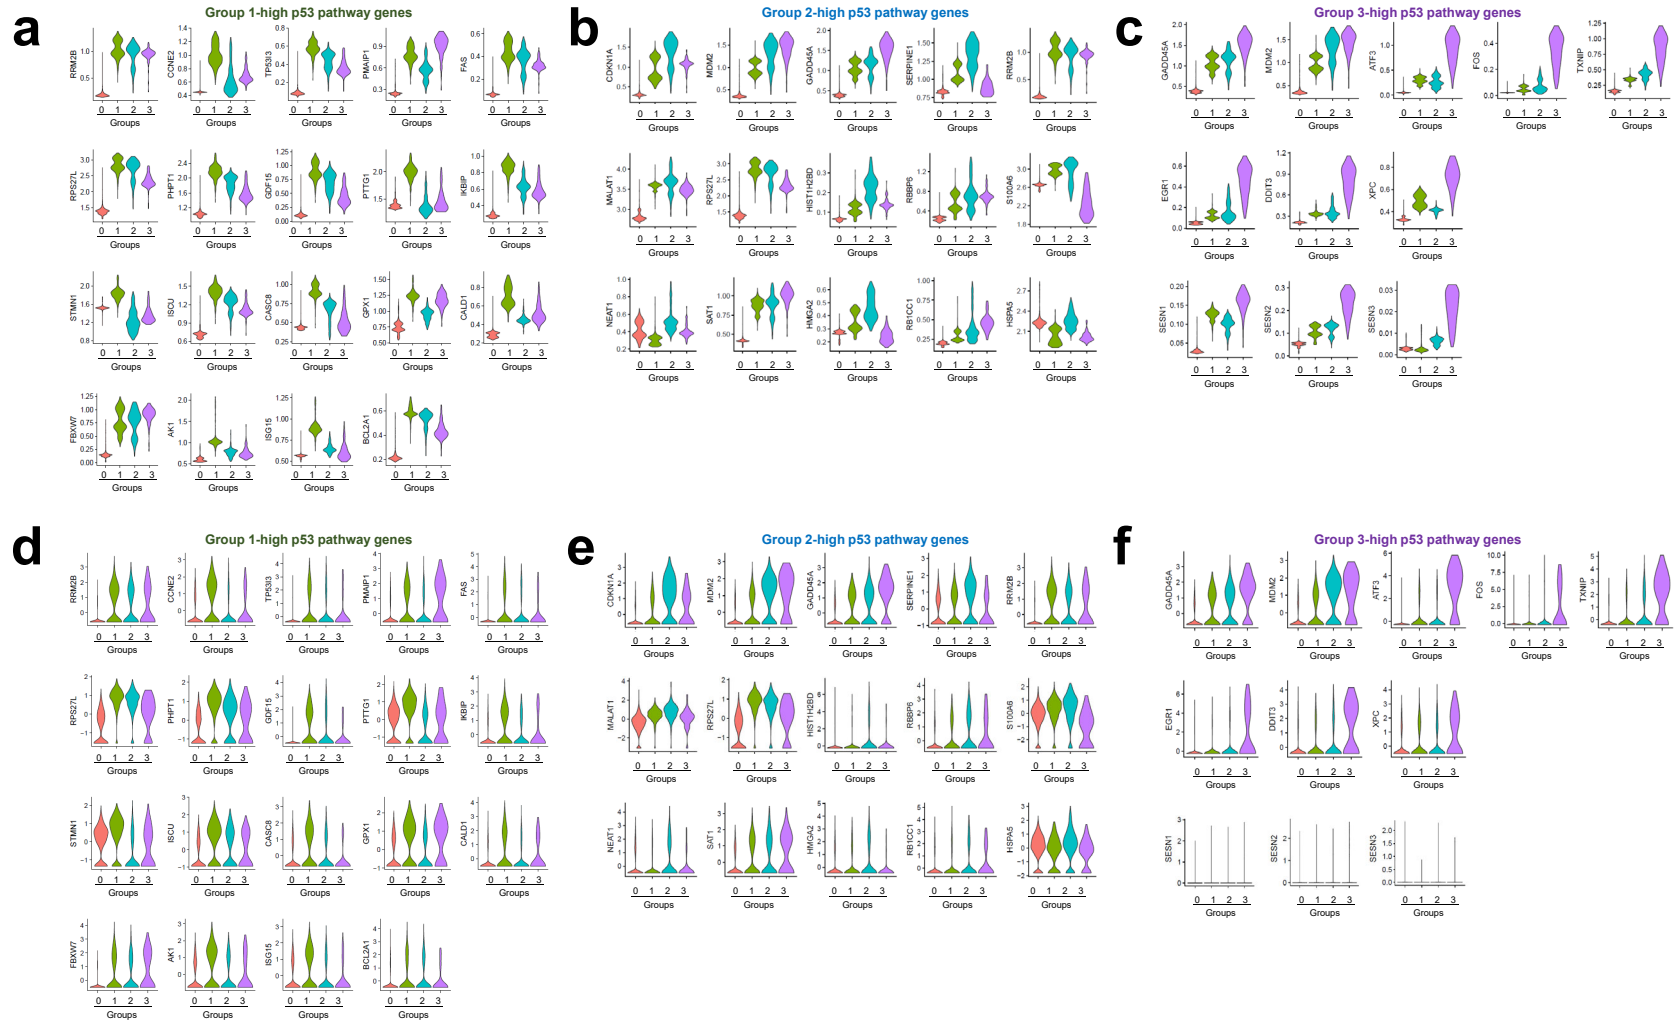



# Extended Data Fig 6. Park et al.

bioRxiv preprint doi: <https://doi.org/10.1101/737130>; this version posted August 15, 2019. The copyright holder for this preprint (which was not certified by peer review) is the author/funder, who has granted bioRxiv a license to display the preprint in perpetuity. It is made available under aCC-BY 4.0 International license.

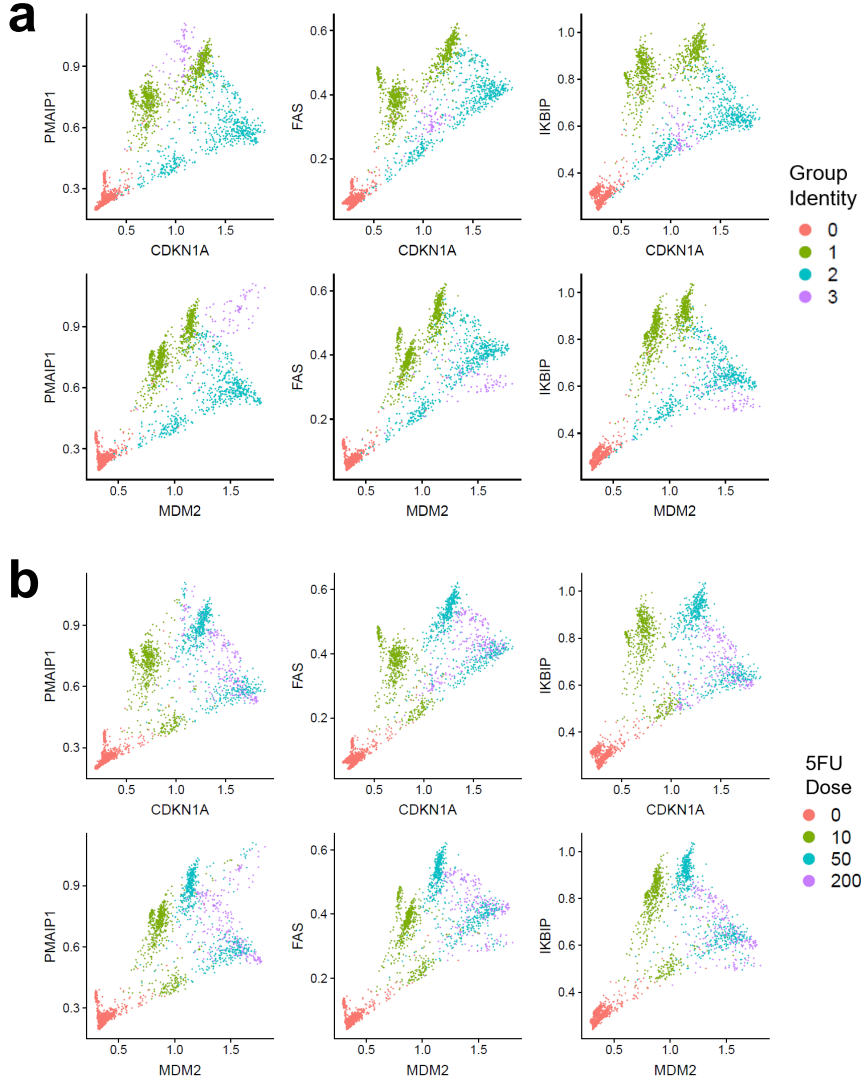

Source: https://www.biorxiv.org/content/10.1101/737130v1.full.pdf
